# Supplementary material
Source: Springer Nature journal article supplement (https://www.springermedizin.de/resource/supplementary/12889_2012_4400_MOESM4_ESM.pdf/9492466)
Supplement: MOESM4 [file 9492466]

Table 1

| Outcomes                         | Tasks                         |                                                      |
|----------------------------------|-------------------------------|------------------------------------------------------|
| Programme Objectives             | <i>Performance objective</i>  | - decrease risk of CVD                               |
|                                  | <i>Changeable determinant</i> | - increase cardiorespiratory fitness                 |
|                                  | <i>Target population</i>      | - cleaners                                           |
| Theoretical methods              | <i>Literature review</i>      | - > 60% of VO <sub>2</sub> max > 60 min/week         |
|                                  | <i>Method to strategy</i>     | - worksite-adjusted intervention                     |
| Programme design                 | <i>Strategy to plan</i>       | - facilitating specific worksite group               |
|                                  | <i>Instruction materials</i>  | - aerobic exercise sessions                          |
|                                  | <i>Pre-test materials</i>     | - pilot study with cleaners                          |
|                                  | <i>Intervention materials</i> | - adjusted aerobic exercise sessions                 |
| Adoption and Implementation plan | <i>Linkage system</i>         | - facilitating specific worksite group               |
|                                  | <i>Adoption objectives</i>    | - registration of conducted planned activities       |
|                                  |                               | - target group participation                         |
|                                  | <i>Adoption determinants</i>  | - logistic planning of work and activities           |
|                                  |                               | - collaboration between organisation and researchers |
|                                  | <i>Implementation plan</i>    | - activities planned in collaboration                |
| Monitoring and evaluation plan   | <i>Evaluation model</i>       | - participation registration                         |
|                                  |                               | - on-going adjustments in aerobic exercise           |
|                                  | <i>Effect evaluation</i>      | - increased cardiorespiratory fitness                |
|                                  |                               | - decreased diurnal blood pressure                   |
|                                  |                               | - improve self-rated work productivity               |
|                                  |                               | - reduce rate of RPE during work                     |
|                                  |                               | - improve metabolic cardiovascular risk factors      |
|                                  |                               | - reduce the need for recovery                       |
|                                  | <i>Process evaluation</i>     | - reach of target group                              |
|                                  |                               | - delivering of activities                           |
|                                  |                               | - receipt of activities                              |
